# Supplementary material for: The nanocomposite of polyaniline and nitrogen-doped layered HTiNbO5with excellent visible-light photocatalytic performance
Source: Royal Society of Chemistry journal article supplement (doi:10.1039/c4cp01423e), 2014-01-01
Supplement: c4cp01423e1.pdf [file c4cp01423e1.pdf]

## Supplementary Information

### Nanocomposite of Polyaniline and Nitrogen-doped Layered HTiNbO<sub>5</sub> with an Excellent Visible-light Photocatalytic Performance

Chao Liu<sup>a</sup>, Liang Wu<sup>a</sup>, Jing Chen<sup>\*b</sup>, Ji-yuan Liang<sup>a</sup>, Chang-shun Li<sup>a</sup>, Hong-mei Ji<sup>a</sup>, Wen-hua Hou<sup>\*a</sup>

<sup>a</sup> Key Laboratory of Mesoscopic Chemistry of MOE, School of Chemistry and Chemical Engineering, Nanjing University, Nanjing, 210093, P. R. China

<sup>b</sup> Department of Applied Chemistry, College of Science, Nanjing University of Technology, Nanjing 210009, P. R. China

\*Corresponding author. Tel: (+86)-25-83686001; E-mail: [whou@nju.edu.cn](mailto:whou@nju.edu.cn); E-mail: [cj1908@126.com](mailto:cj1908@126.com)

**Table S1. Summary of optical power and power density**

| $d^a$ (cm) | Optical power (mW) | Optical power density (mW/cm <sup>2</sup> ) |
|------------|--------------------|---------------------------------------------|
| 1          | 475                | 633                                         |
| 2          | 451                | 602                                         |
| 3          | 430                | 573                                         |
| 4          | 406                | 541                                         |
| 5          | 380                | 506                                         |
| 6          | 358                | 477                                         |
| 7          | 334                | 441                                         |
| 8          | 313                | 416                                         |
| 9          | 291                | 389                                         |
| 10         | 255                | 352                                         |

<sup>a</sup>  $d$  means the distance between thin film filter and the probe of CEL-NP2000. The starting upper and lowest liquid surfaces of MB solution are about 3 and 9 cm apart from filter in the photocatalytic tests, respectively.

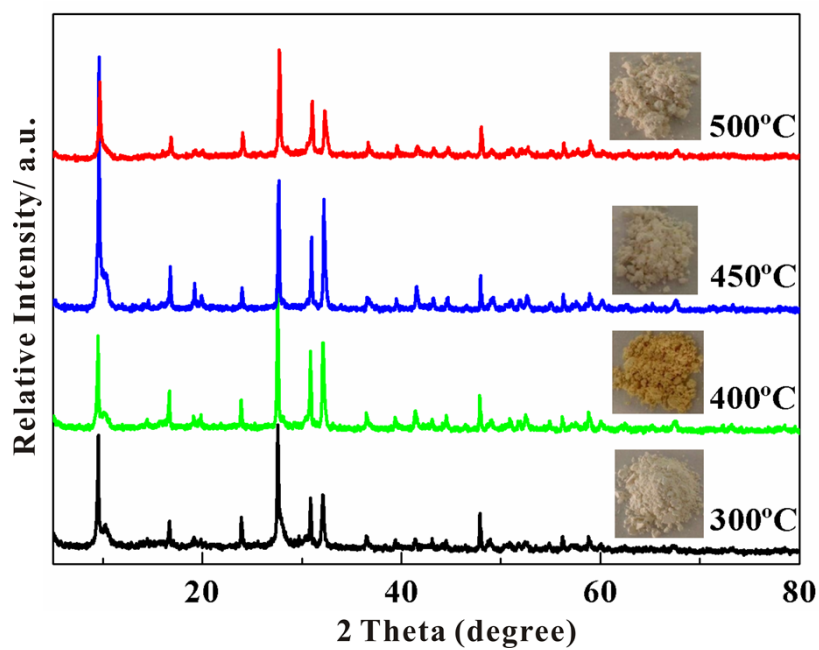

**Fig. S1** X-ray powder diffraction patterns of N-KTiNbO<sub>5</sub> through heating KTiNbO<sub>5</sub> with urea in air at 300, 400, 450 and 500 °C for 5 h (Inset are photos of corresponding samples).

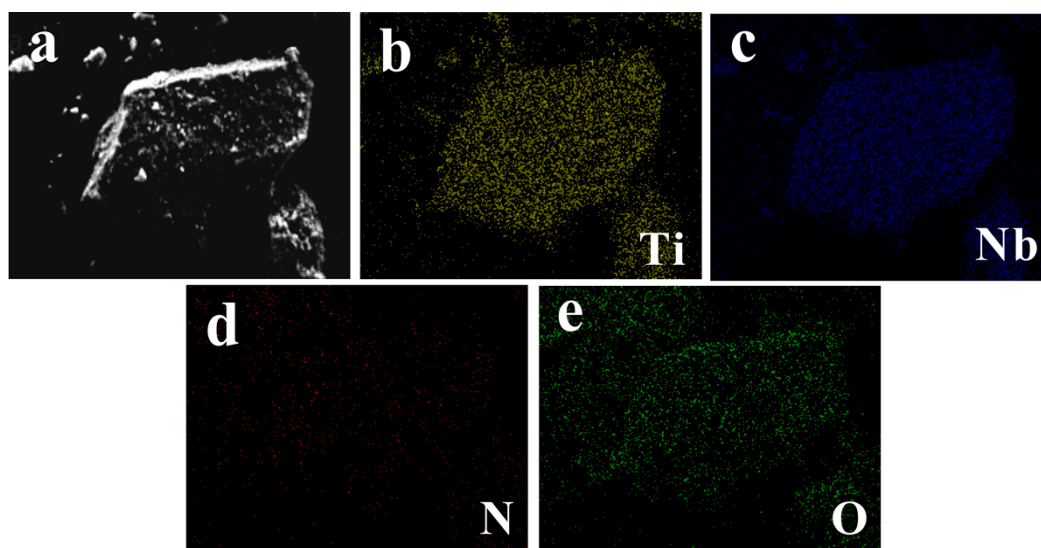

**Fig. S2** EDS mapping of N-KTiNbO<sub>5</sub>.

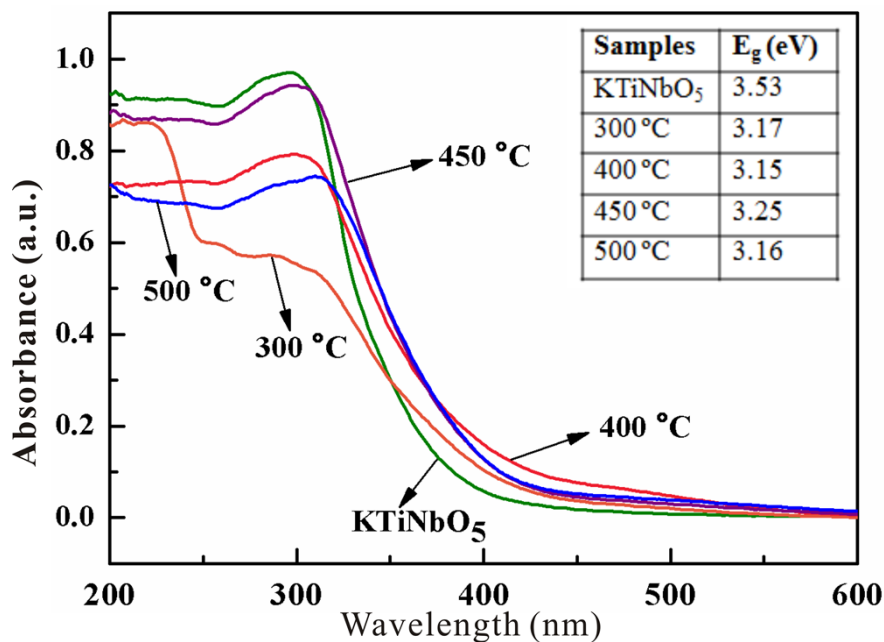

**Fig. S3** UV-visible diffuse reflectance spectra of N-KTiNbO<sub>5</sub> prepared at 300, 400, 450, and 500 °C, respectively (Inset are  $E_g$  values of corresponding samples which were obtained through the equation:  $ah\nu = B(h\nu - E_g)^{1/2}$  where  $a$  is the absorbance intensity at a light frequency  $\nu$ ,  $B$  is the absorbance constant and  $E_g$  is the band gap energy).

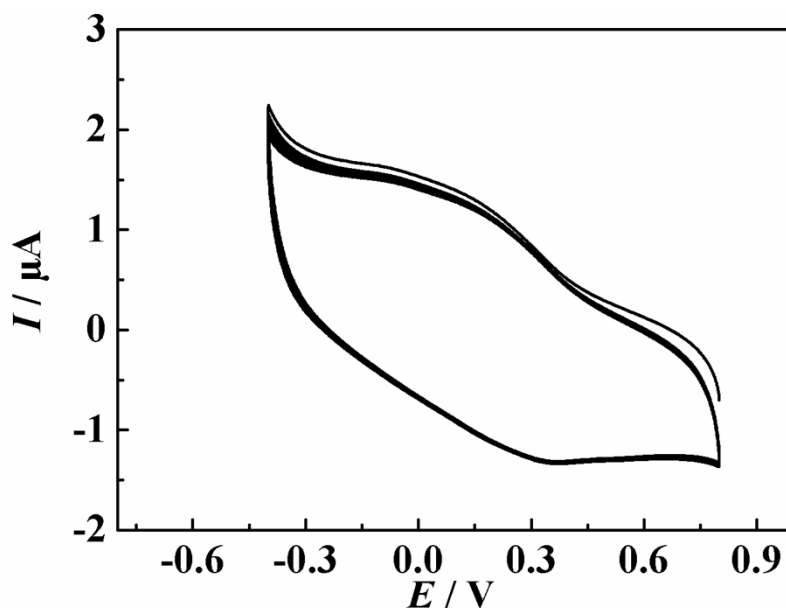

**Fig. S4** CV curves of PANI/N-HTiNbO<sub>5</sub> nanocomposite upon repeated potential cycling for 50 cycles in the potential range between -0.4 and +0.8V.
